# Supplementary material for: Non-enzymatic biosensor based on F,S-doped carbon dots/copper nanoarchitecture applied in the simultaneous electrochemical determination of NADH, dopamine, and uric acid in plasma
Source: Royal Society of Chemistry journal article supplement (doi:10.1039/d3an02239k), 2024-01-01
Supplement: d3an02239k1.pdf [file d3an02239k1.pdf]

Supplementary information

**Non-enzymatic biosensor based on F, S-doped Carbon dots/ Copper nanoarchitecture applied in the Simultaneous electrochemical determination of NADH, Dopamine, and Uric acid in plasma.**

**Octávio P L de Souza, Daniel Y Tiba, Joao H A Ferreira, Laura C Lieb and Thiago C Canevari\***

LabNaHm: Multifunctional Hybrid Nanomaterials Laboratory. Engineering School, Mackenzie Presbyterian University, 01302-907 São Paulo, SP, Brazil.

\*Corresponding author

Tel/Fax: (+55) 11 2114-8884

E-mail address: [tccanevari@gmail.com](mailto:tccanevari@gmail.com)

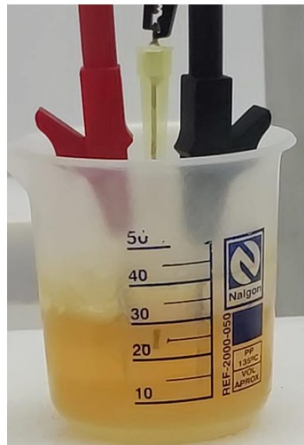

**F, S-doped Carbon dots  
chronoamperometry synthesis.**

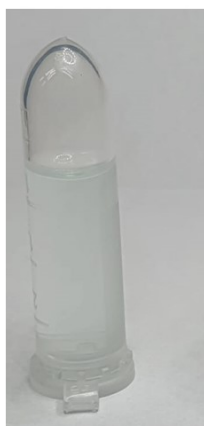

**Copper nitrate alcoholic solution.**

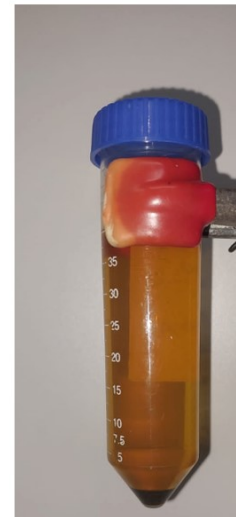

**F, S-doped Carbon dots/ Copper  
nanoarchitecture synthesis.**

**Figure S1:** Images of solutions of F, S-doped Carbon dots (left), alcoholic solution of  $\text{CuNO}_3$  (middle), and the final solution of F, S-doped Carbon dots/  $\text{CuONPs}$  (right).

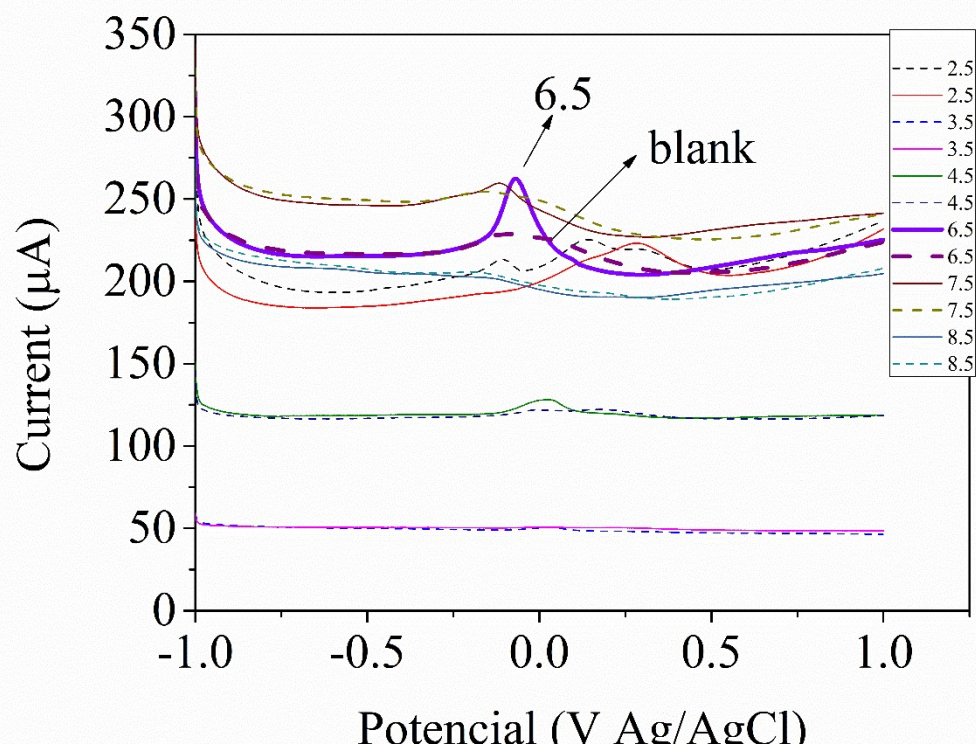

**Figure S2:** pH study of NADH determination.

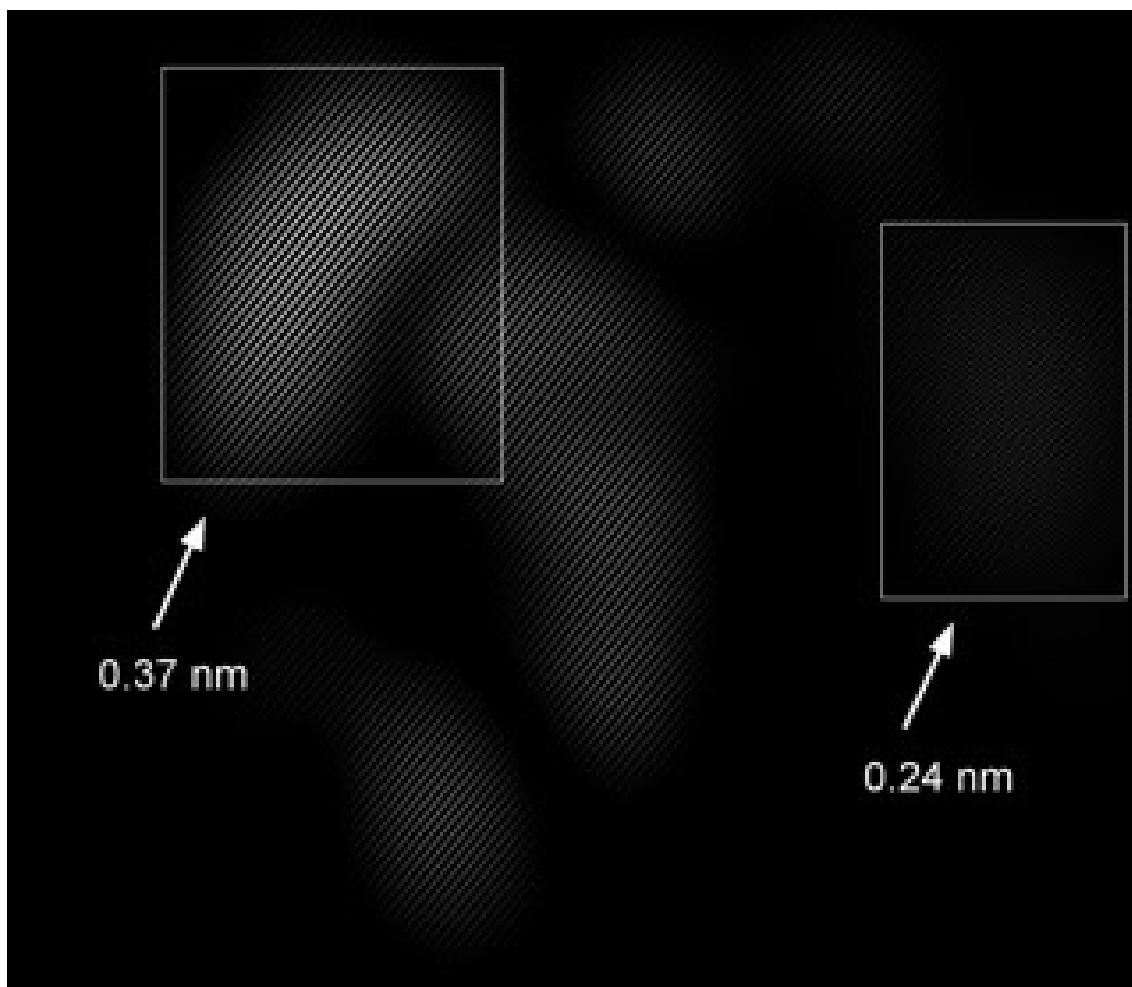

**Figure S3:** Interplanar distance of HR-TEM dark Images of F, S-doped Carbon dots.

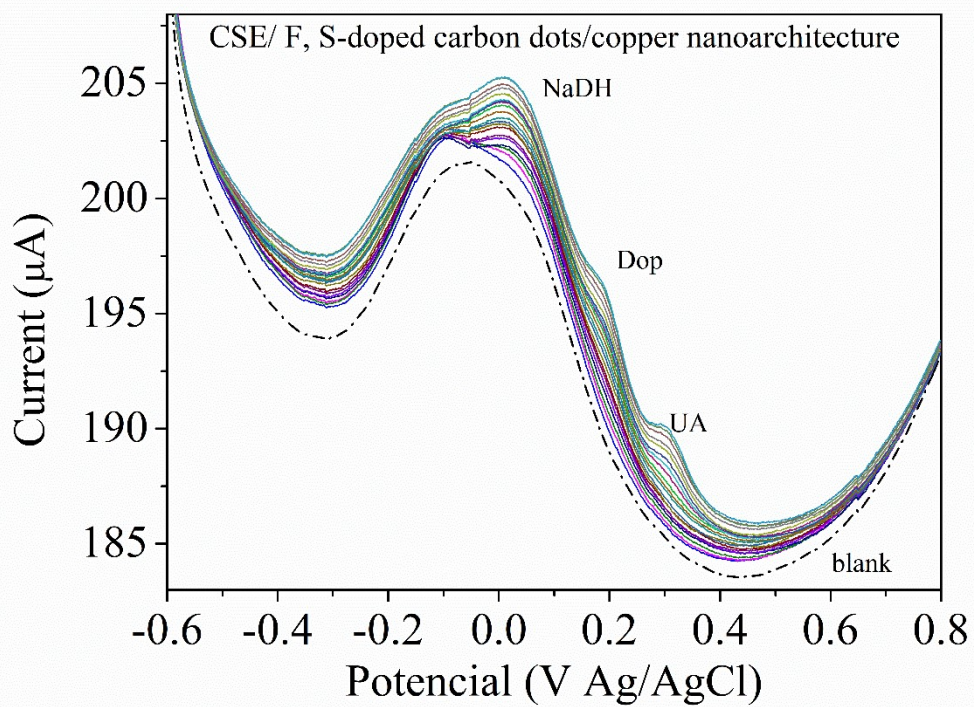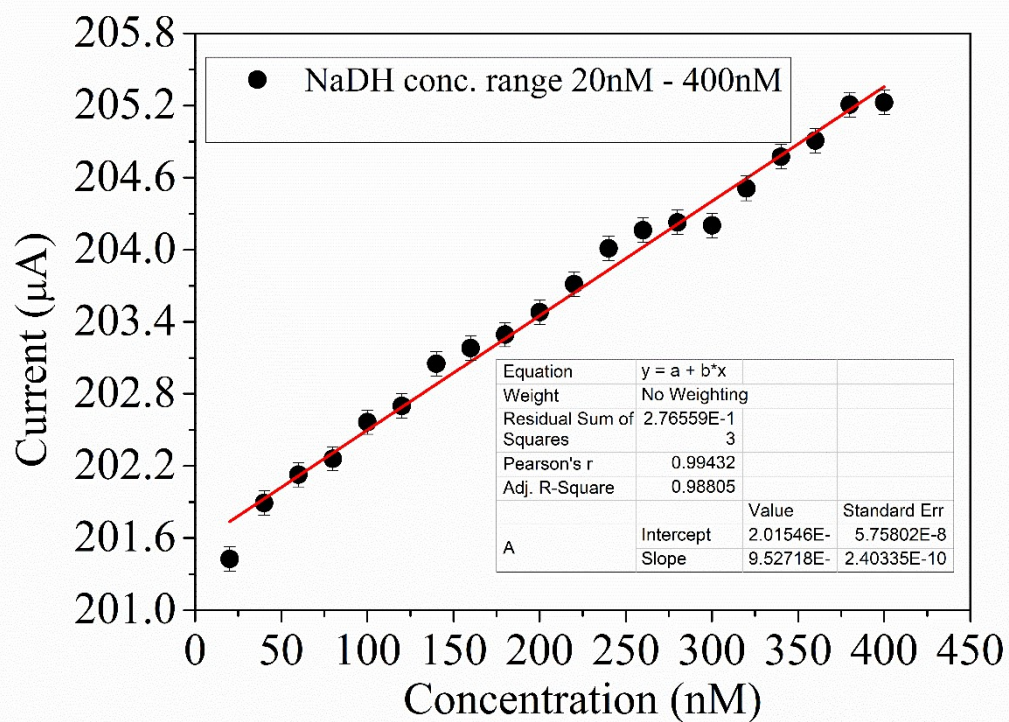

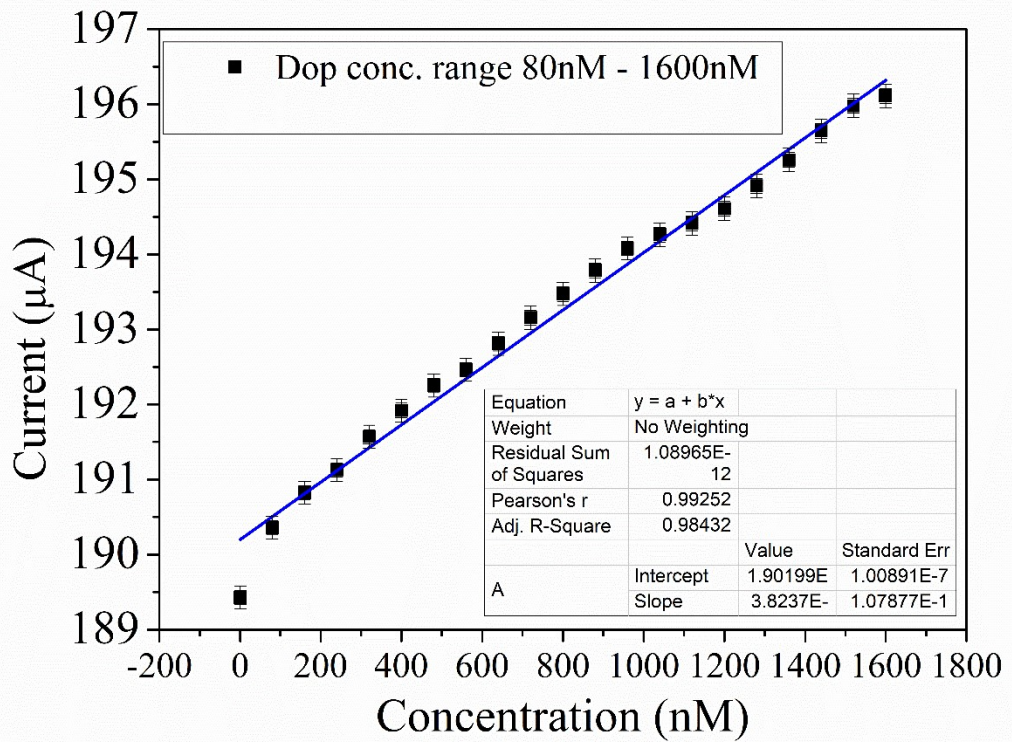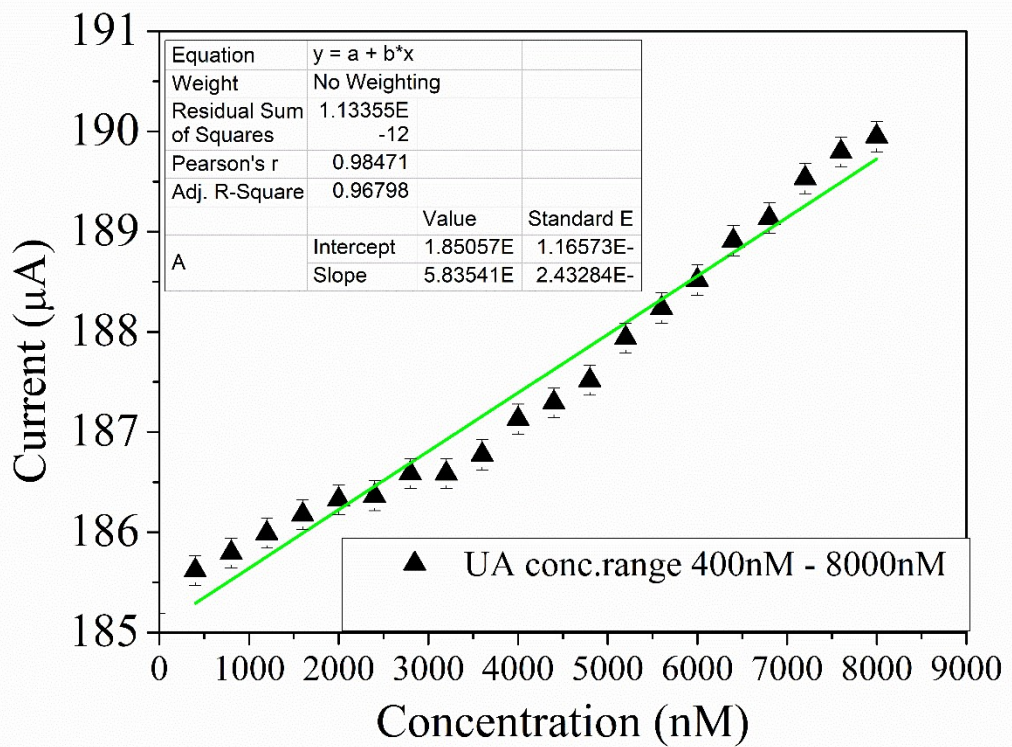

**Figure S4:** Electrocatalytic response for the simultaneous determination of NADH, DOP, and UA in the presence of AA, with a clear separation between peaks in the presence of AA (fixed  $C=18 \times 10^{-6} \text{ mol L}^{-1}$ ), with small concentrations of species, being [NADH] ranging from  $2 \times 10^{-8}$  to  $4 \times 10^{-6} \text{ mol L}^{-1}$ , [DOP] ranging from  $8 \times 10^{-8}$  to  $16 \times 10^{-6} \text{ mol L}^{-1}$ , [UA] ranging from  $4 \times 10^{-7}$  to  $8 \times 10^{-5} \text{ mol L}^{-1}$ . (all measurements with error bar 3%).
